# Supplementary material for: Xanthomonas citri subsp. citri type III effector PthA4 directs the dynamical expression of a putative citrus carbohydrate-binding protein gene for canker formation
Source: eLife journal article supplement (doi:10.7554/elife.91684), 2024-03-11
Supplement: fig3-data12 [file elife-91684-fig3-data12-v1.pdf]

**E**

PCs9g12620

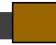

- TCCCACCTTTAATATATAAA  
 1 ACCCACCTTTAATATATAAA  
 2 CCCCACCTTTAATATATAAA  
 3 GCCCACCTTTAATATATAAA

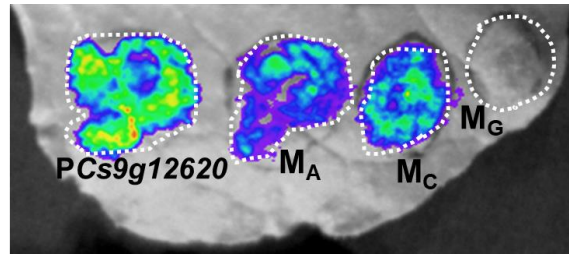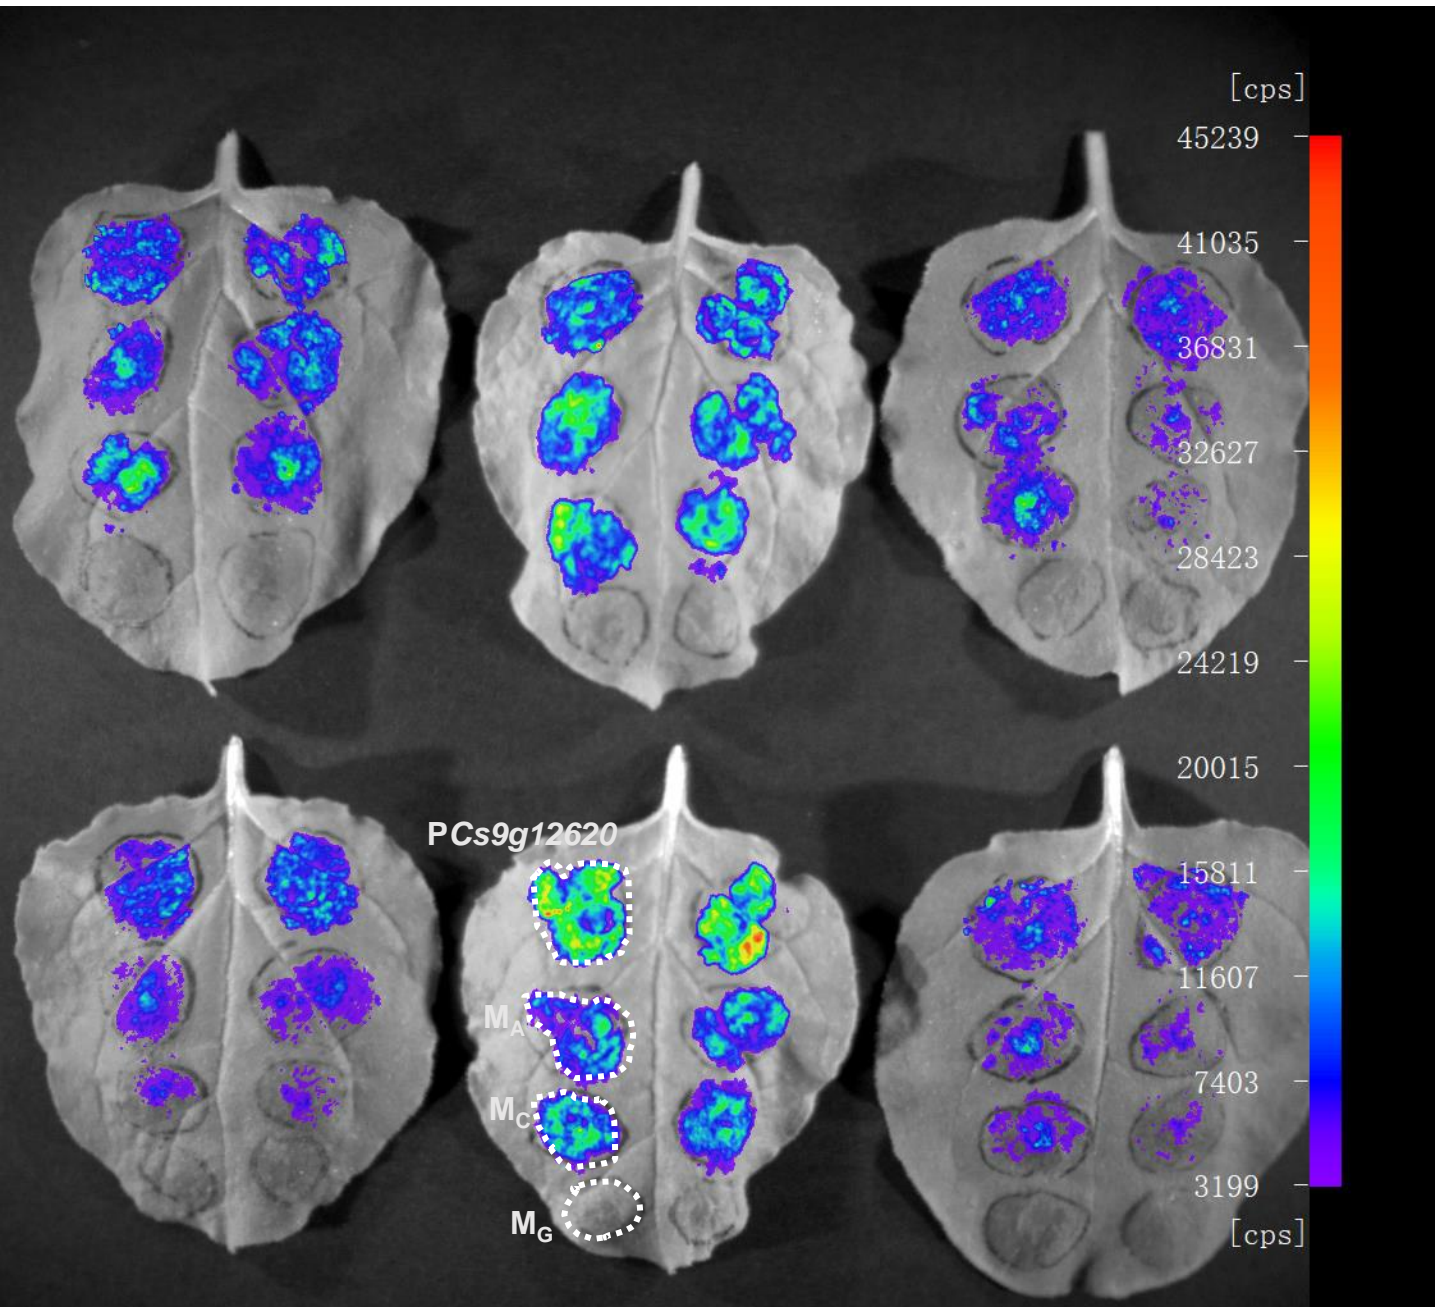**Figure 3**
