# Supplementary material for: Xanthomonas citri subsp. citri type III effector PthA4 directs the dynamical expression of a putative citrus carbohydrate-binding protein gene for canker formation
Source: eLife journal article supplement (doi:10.7554/elife.91684), 2024-03-11
Supplement: fig4-data7 [file elife-91684-fig4-data7-v1.pdf]

**C**

**Histochemical staining**

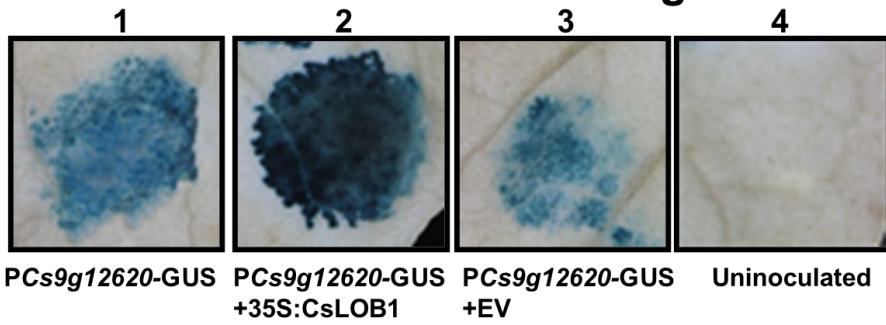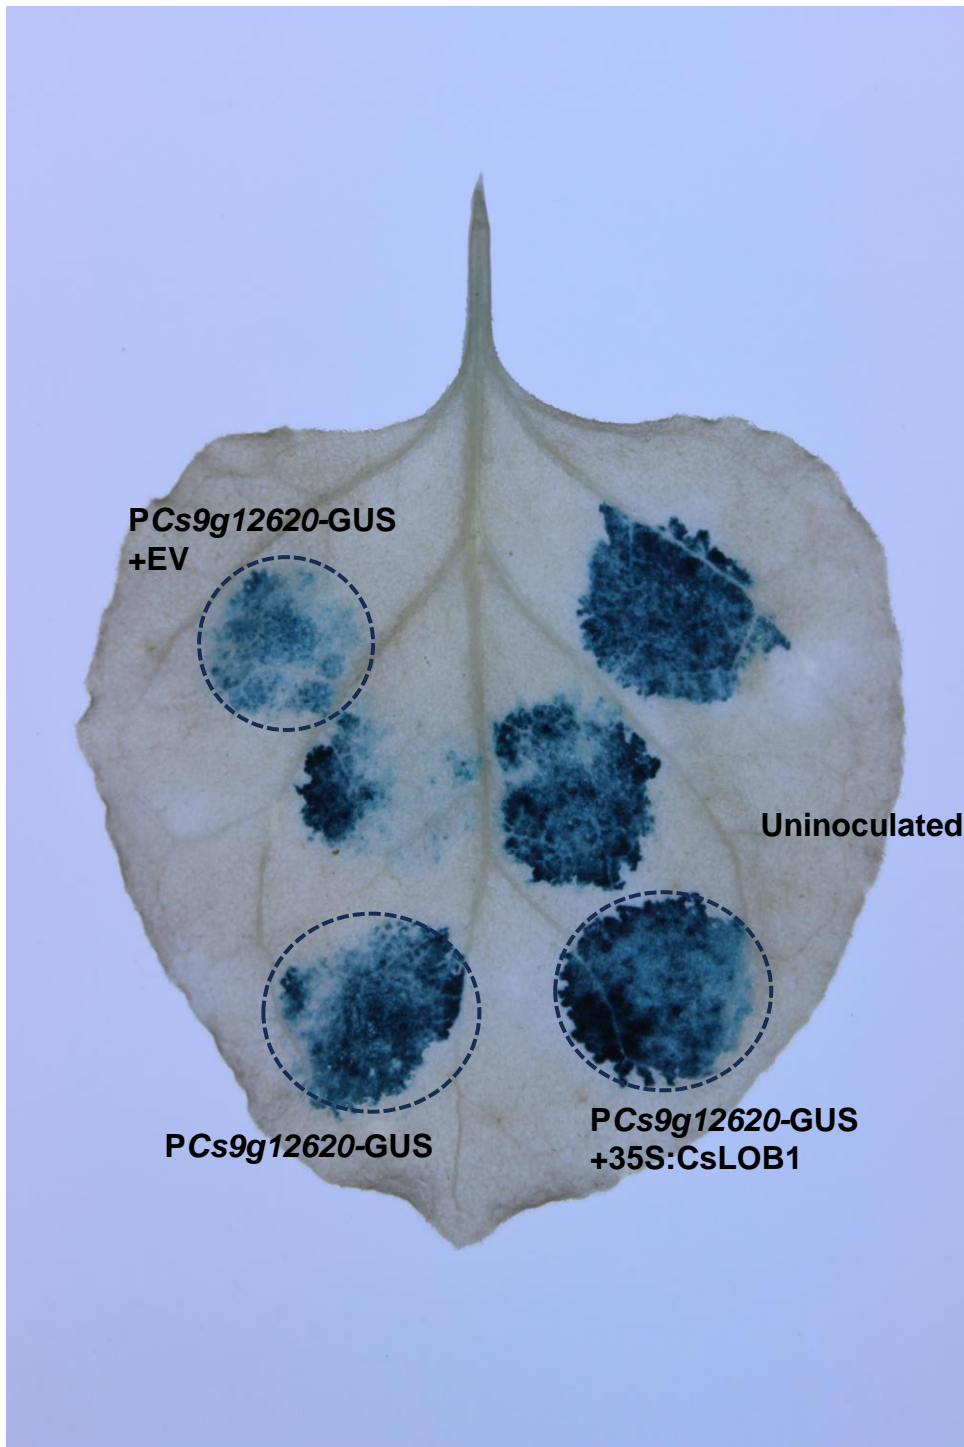

**Figure 4**
