# Supplementary material for: Xanthomonas citri subsp. citri type III effector PthA4 directs the dynamical expression of a putative citrus carbohydrate-binding protein gene for canker formation
Source: eLife journal article supplement (doi:10.7554/elife.91684), 2024-03-11
Supplement: fig5-data3 [file elife-91684-fig5-data3-v1.pdf]

**A****Histochemical staining**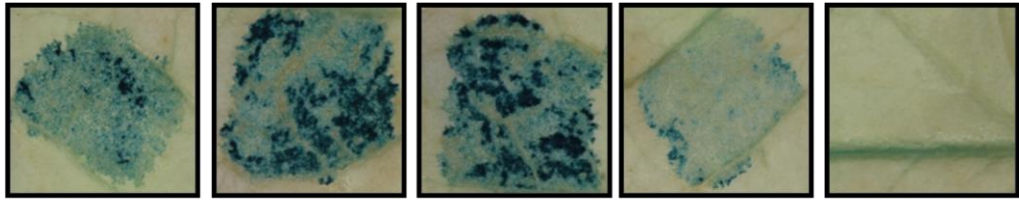**PCsLOB1-GUS****PCsLOB1-GUS  
+35S:PthA4****PCsLOB1-GUS  
+35S:PthA4  
+35S:CsLOB1****PCsLOB1-GUS  
+EV****Uninoculated**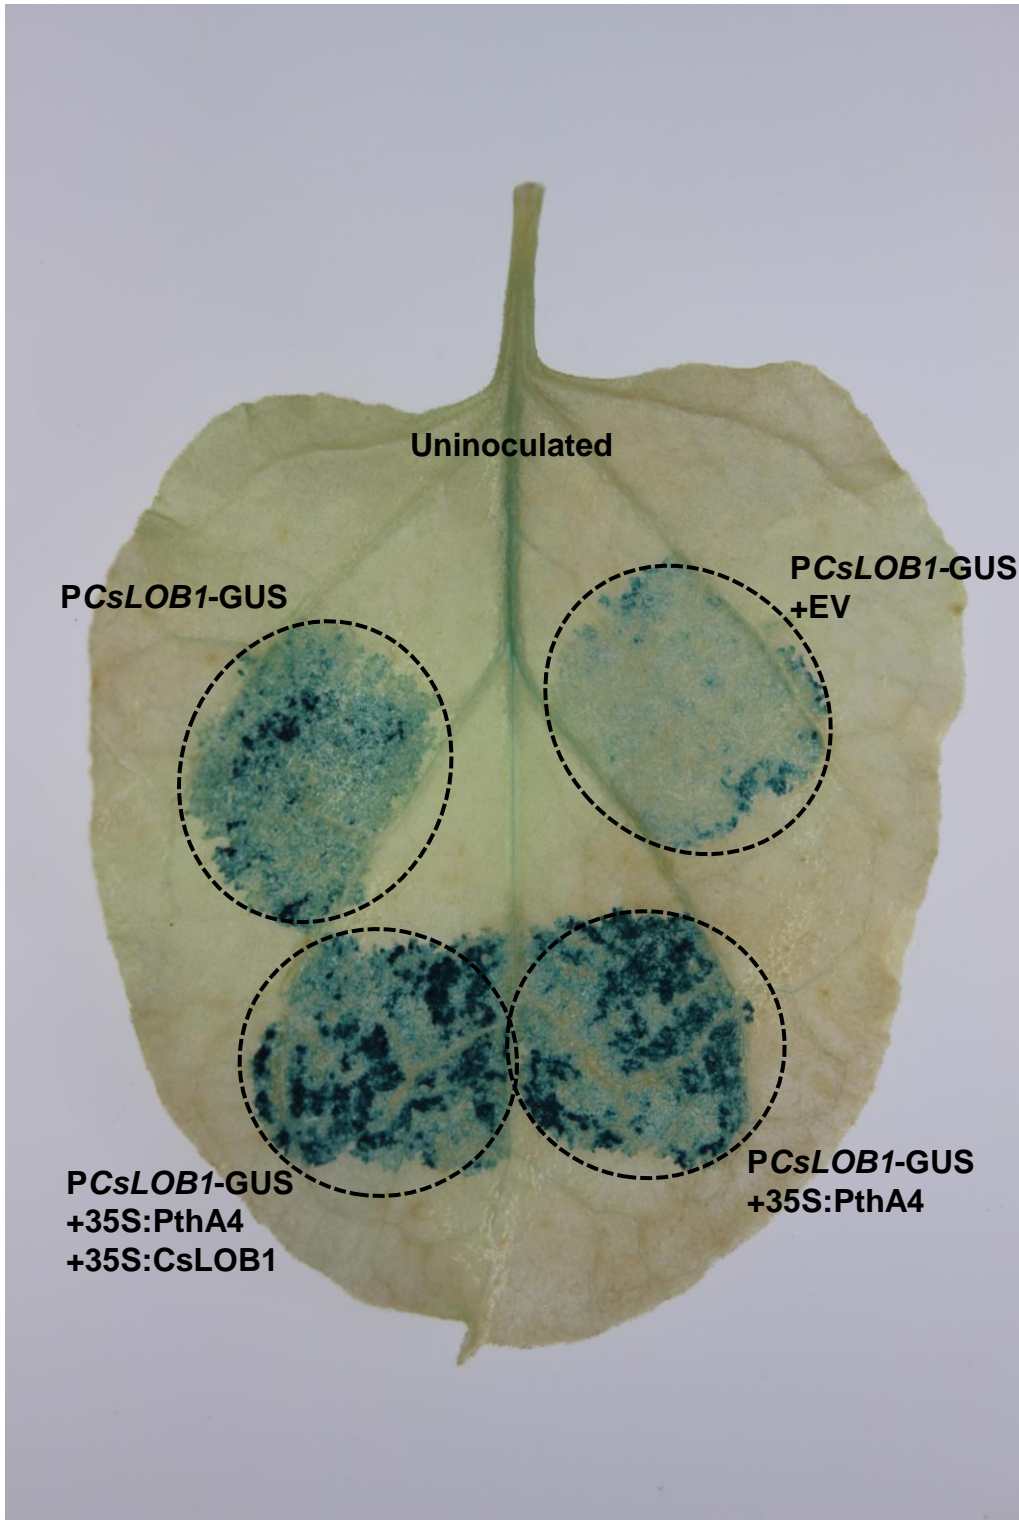**Uninoculated****PCsLOB1-GUS****PCsLOB1-GUS  
+EV****PCsLOB1-GUS  
+35S:PthA4  
+35S:CsLOB1****PCsLOB1-GUS  
+35S:PthA4****Figure 5**
