# Supplementary material for: Xanthomonas citri subsp. citri type III effector PthA4 directs the dynamical expression of a putative citrus carbohydrate-binding protein gene for canker formation
Source: eLife journal article supplement (doi:10.7554/elife.91684), 2024-03-11
Supplement: fig5-data5 [file elife-91684-fig5-data5-v1.pdf]

**B**

### Histochemical staining

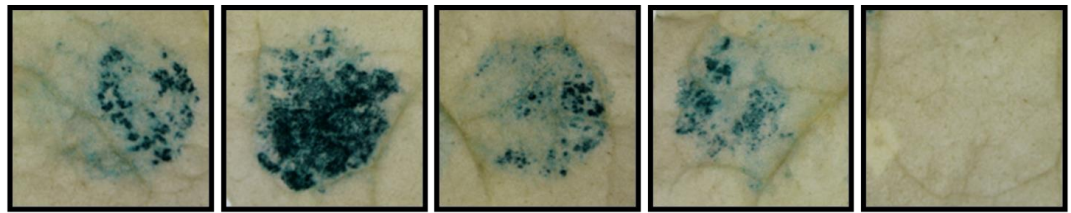

PCs9g12620-GUS    PCs9g12620-GUS +35S:CsLOB1    PCs9g12620-GUS +35S:CsLOB1 +35S:PthA4    PCs9g12620-GUS +EV    Uninoculated

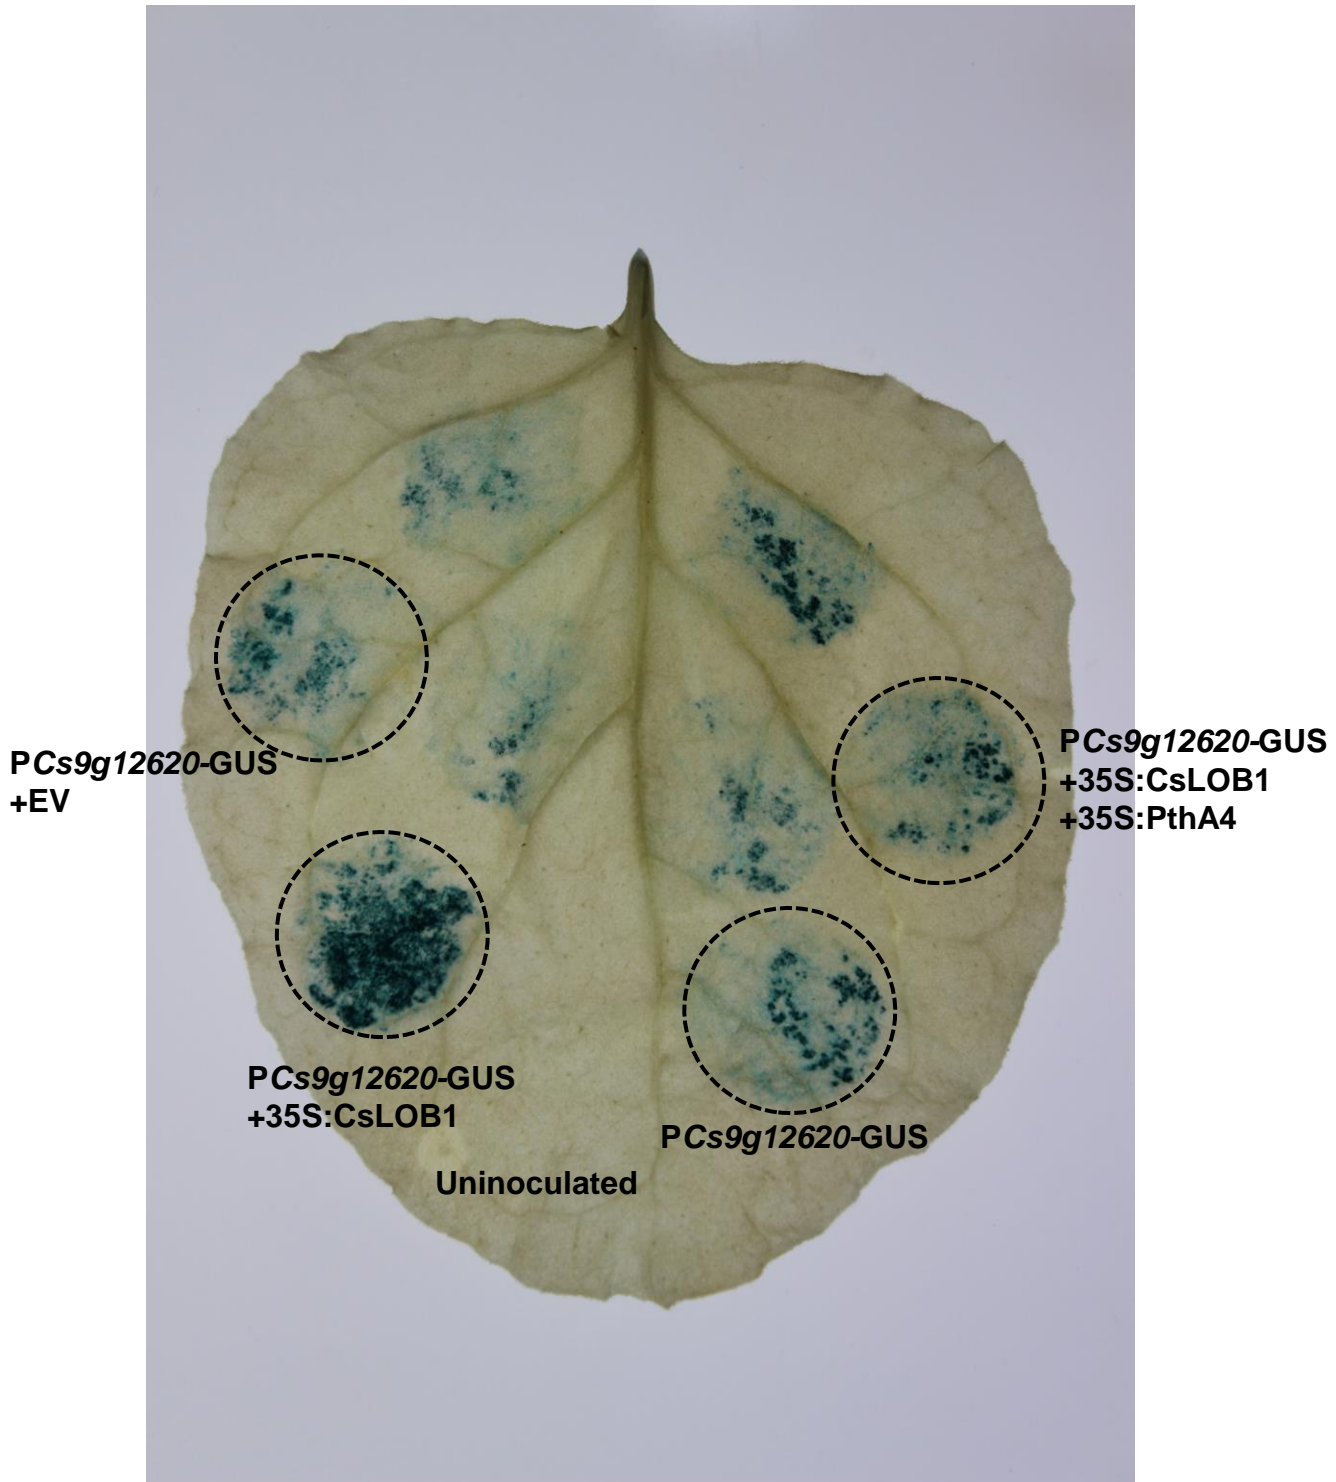

**Figure 5**
