# Supplementary material for: Xanthomonas citri subsp. citri type III effector PthA4 directs the dynamical expression of a putative citrus carbohydrate-binding protein gene for canker formation
Source: eLife journal article supplement (doi:10.7554/elife.91684), 2024-03-11
Supplement: fig6-data11 [file elife-91684-fig6-data11-v1.pdf]

**C**

1. PthA4-nLUC+cLUC-CsLOB1

2. PthA4-nLUC+cLUC-GFP

3. GFP-nLUC+cLUC-CsLOB1

4. GFP-nLUC+cLUC-GFP

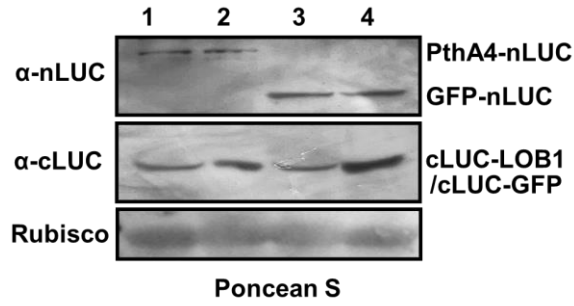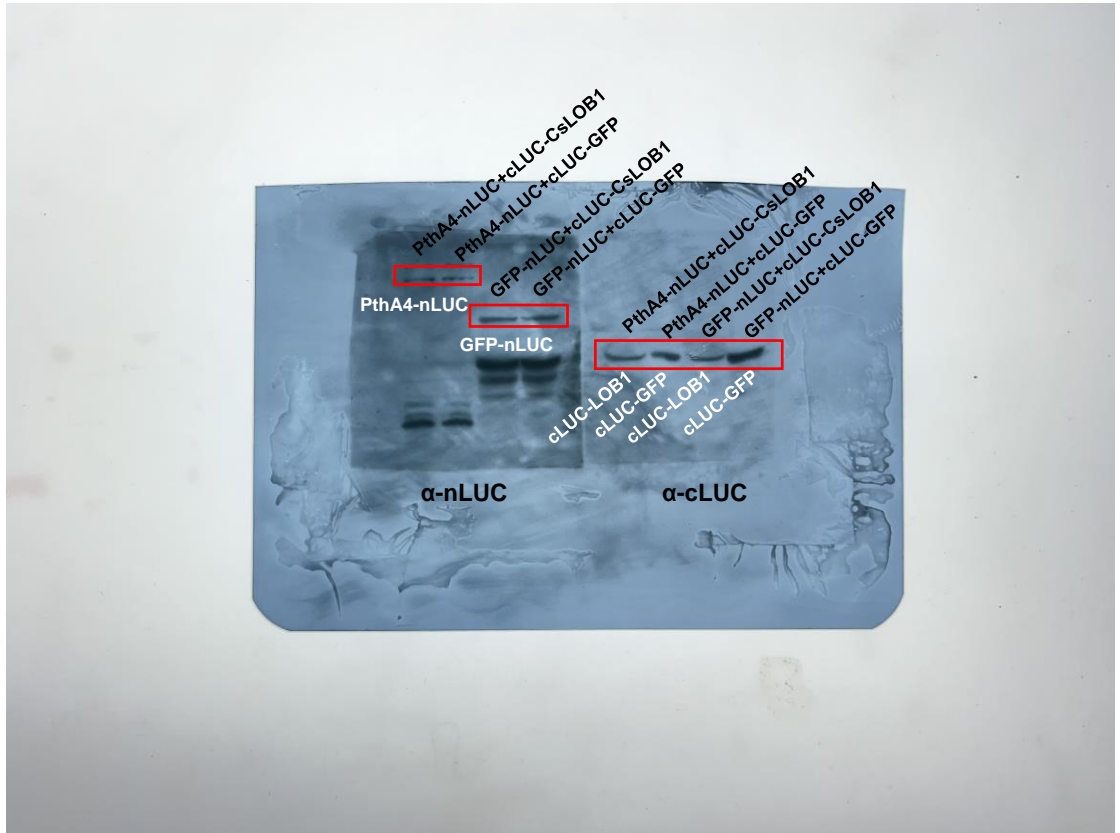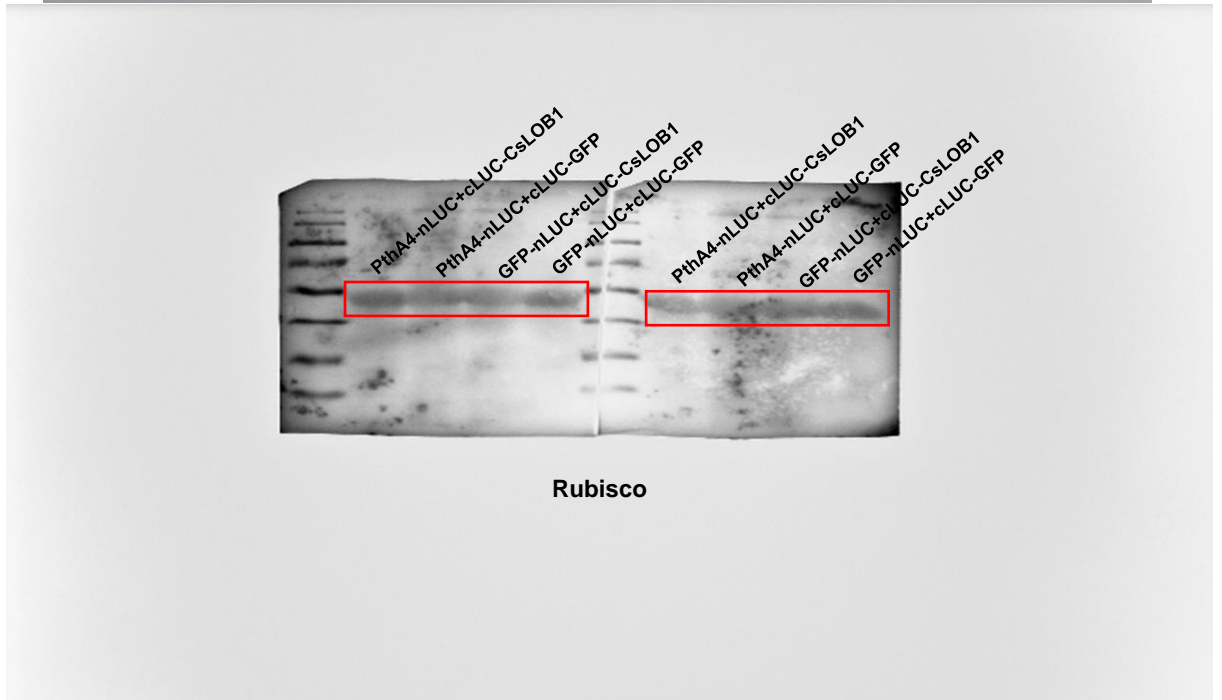**Figure 6**
