# Supplementary material for: Xanthomonas citri subsp. citri type III effector PthA4 directs the dynamical expression of a putative citrus carbohydrate-binding protein gene for canker formation
Source: eLife. 2024 Aug 13;13:RP91684. doi: 10.7554/eLife.91684 (PMC11321762; doi:10.7554/eLife.91684)
Supplement: Figure 1—source data 1. [file elife-91684-fig1-data1.xlsx]

## Sheet: Sheet1
Figure 1C raw data
Cs9g12620	Uninoculated	Xcc 29-1	Xcc29-1/avrXa7
1	1.02	107.96	2.67471
2	1	91.5046	3.47532
3	1.043	97.6653	2.34589
CsLOB1	Uninoculated	Xcc 29-1	Xcc29-1/avrXa7
1	1.02	166.878	12.7777
2	1	158.635	12.9824
3	1.043	161.648	12.3457
Figure 1E raw data
Cs9g12620	Uninoculated	Xcc 29-1	Xcc29-1/avrXa7
1	1.02	104.658	2.14678
2	1	92.5046	3.13258
3	1.043	94.6653	3.54363
CsLOB1	Uninoculated	Xcc 29-1	Xcc29-1/avrXa7
1	1.02	166.878	12.9824
2	1	148.436	13.3235
3	1.043	156.88	13.4537
