# Supplementary material for: Xanthomonas citri subsp. citri type III effector PthA4 directs the dynamical expression of a putative citrus carbohydrate-binding protein gene for canker formation
Source: eLife. 2024 Aug 13;13:RP91684. doi: 10.7554/eLife.91684 (PMC11321762; doi:10.7554/eLife.91684)
Supplement: Figure 2—source data 1. [file elife-91684-fig2-data1.xlsx]

## Sheet: Sheet1
Figure 2D raw dara
RLU	1	2	3
PCs9g12620	11636.4	11370.6	12248.9
PCs9g12650	443.63	360.22	481.32
Figure 2E raw data
RLU	1	2	3
PCs9g12620	17254.8	14791.2	16490.5
PCs9g12620-M	4234.46	4049	4141.73
