# Supplementary material for: Xanthomonas citri subsp. citri type III effector PthA4 directs the dynamical expression of a putative citrus carbohydrate-binding protein gene for canker formation
Source: eLife. 2024 Aug 13;13:RP91684. doi: 10.7554/eLife.91684 (PMC11321762; doi:10.7554/eLife.91684)
Supplement: Figure 3—source data 1. [file elife-91684-fig3-data1.xlsx]

## Sheet: Sheet1
Figure 3A raw data
LacZ	pGBKT7-PthA4 +pG221-PCs9g12620	pGBKT7-PthA4 +pG221	pGBKT7 +pG221-PCs9g12620	pGBKT7 +pG221
1	3.85	0.32	0.134	0.152
2	3.87	0.342	0.14329	0.137
3	4.35	0.274	0.14356	0.146
Figure 3C raw data
GusA	Mean	SD	N
PCs9g12620-GUS	1	0.11767	3
PCs9g12620-GUS +35S:PthA4	0.84328	0.05483	3
PCs9g12620-GUS +EV	1.10028	0.08732	3
Uninoculated	0.00392	0.00022	3
PthA4	Mean	SD	N
PCs9g12620-GUS	1	0.10495	3
PCs9g12620-GUS +35S:PthA4	682.428	26.516	3
PCs9g12620-GUS +EV	0.9927	0.00154	3
Uninoculated	0.91789	0.03676	3
Figure 3F raw data
LacZ	pGBKT7-PthA4
PCs9g12620	3.85	3.87	4.35
PCs9g12620-MA	0.21	0.31	0.26
PCs9g12620-MC	0.26	0.28	0.23
PCs9g12620-MG	0.67	0.5	0.8
Figure 3G raw data
RLU	EV			PthA4
PCs9g12620	12248.9	14558	13403.5	6498.9	8151.41	8157.78
PCs9g12620-MA	8571.69	11394.7	9983.2	6262.87	6280.18	7178.24
PCs9g12620-MC	10297.9	12616	11456.9	7143.94	7321.02	7543.07
PCs9g12620-MG	1524.44	2299.4	379.98	249.24	1501.28	721.28
