# Supplementary material for: Xanthomonas citri subsp. citri type III effector PthA4 directs the dynamical expression of a putative citrus carbohydrate-binding protein gene for canker formation
Source: eLife. 2024 Aug 13;13:RP91684. doi: 10.7554/eLife.91684 (PMC11321762; doi:10.7554/eLife.91684)
Supplement: Figure 4—source data 1. [file elife-91684-fig4-data1.xlsx]

## Sheet: Sheet1
Figure 4A raw data
LacZ	pGBKT7-CsLOB1 +pG221-PCs9g12620	pGBKT7-CsLOB1 +pG221	pGBKT7 +pG221-PCs9g12620	pGBKT7 +pG221
1	5.24	0.31	0.134	0.152
2	5.87	0.235	0.14578	0.137
3	5.53	0.297	0.14268	0.146
Figure 4C raw data
GusA	Mean	SD	N
PCs9g12620-GUS	1	0.11837	3
PCs9g12620-GUS +35S:CsLOB1	3.38432	0.29483	3
PCs9g12620-GUS +EV	0.93215	0.07523	3
Uninoculated	0.0042	0.000942273	3
CsLOB1	Mean	SD	N
PCs9g12620-GUS	1	0.08324	3
PCs9g12620-GUS +35S:CsLOB1	426.131	38.4081	3
PCs9g12620-GUS +EV	0.93857	0.00545	3
Uninoculated	1.02781	0.03968	3
Figure 4D raw data
LacZ	pGBKT7-CsLOB1 +pG221-PCs9g12620	pGBKT7-CsLOB1 +pG221-PCs9g12620-MLB1	pGBKT7-CsLOB1 +pG221-PCs9g12620-MLB2	pGBKT7-CsLOB1 +pG221-PCs9g12620-MLB1/2	pGBKT7 +pG221-PCs9g12620	pGBKT7 +pG221-PCs9g12620-MLB1	pGBKT7 +pG221-PCs9g12620-MLB2	pGBKT7 +pG221-PCs9g12620-MLB1/2	pGBKT7-CsLOB1 +pG221	pGBKT7 +pG221
1	5.53	6.14	6.21	5.82	0.31	0.28	0.16	0.31	0.134	0.152
2	5.21	6.2	6.04	5.98	0.32	0.27	0.17	0.235	0.14578	0.137
3	5.67	6.12	6.12	6.12	0.31	0.27	0.16	0.297	0.14268	0.146
Figure 4F raw data
RLU	EV			CsLOB1
PCs9g12620	14827.5	14791.2	16490.5	54186.1	63224.7	45147.5
PCs9g12620-MLB1	4124.93	3147.78	5102.07	24087.6	32015.1	16160.1
PCs9g12620-MLB2	4422.79	3477.76	5782.06	11162.3	11213.4	12405.1
PCs9g12620-MLB1/2	4352.61	4021.8	4633.83	5831.18	6767.51	7703.84
Figure 4G raw data
P23	Mean	SD	N
WT	1	0.106746	3
CTV	76.6407	3.28353	3
CTV:CsLOB1	56.9923	2.06544	3
CsLOB1	Mean	SD	N
WT	1	0.102198	3
CTV	1.14151	0.114501	3
CTV:CsLOB1	0.518538	0.078327	3
Cs9g12620	Mean	SD	N
CTV	1	0.219158	3
CTV:CsLOB1	0.555179	0.206109
