# Supplementary material for: Xanthomonas citri subsp. citri type III effector PthA4 directs the dynamical expression of a putative citrus carbohydrate-binding protein gene for canker formation
Source: eLife. 2024 Aug 13;13:RP91684. doi: 10.7554/eLife.91684 (PMC11321762; doi:10.7554/eLife.91684)
Supplement: Figure 5—source data 1. [file elife-91684-fig5-data1.xlsx]

## Sheet: Sheet1
Figure 5A raw data
GusA	Mean	SD	N
PCsLOB1:GUS	1	0.11285	3
PCsLOB1:GUS+35S:PthA4	3.6291	0.14459	3
PCsLOB1:GUS+35S:PthA4+35S:CsLOB1	3.6731	0.16851	3
PCsOB1:GUS+EV	0.91325	0.21355	3
Uninoculated	0.112485	0.00219	3
PthA4	Mean	SD	N
PCsLOB1:GUS	1	0.11285	3
PCsLOB1:GUS+35S:PthA4	419.471	36.7164	3
PCsLOB1:GUS+35S:PthA4+35S:CsLOB1	424.621	39.2424	3
PCsOB1:GUS+EV	2.02187	0.36846	3
Uninoculated	0.96219	0.02173	3
CsLOB1	Mean	SD	N
PCsLOB1:GUS	1	0.1269	3
PCsLOB1:GUS+35S:PthA4	1.10218	0.35474	3
PCsLOB1:GUS+35S:PthA4+35S:CsLOB1	241.332	66.721	3
PCsOB1:GUS+EV	0.86494	0.06325	3
Uninoculated	0.76415	0.04298	3
Figure 5B raw data
GusA	Mean	SD	N
PCsLOB1:GUS	1	0.11461	3
PCsLOB1:GUS+35S:PthA4	2.89303	0.21365	3
PCsLOB1:GUS+35S:PthA4+35S:CsLOB1	0.94303	0.08746	3
PCsOB1:GUS+EV	0.81682	0.06587	3
Uninoculated	0.03249	0.00113	3
PthA4	Mean	SD	N
PCsLOB1:GUS	1	0.21365	3
PCsLOB1:GUS+35S:PthA4	1.25459	0.46322	3
PCsLOB1:GUS+35S:PthA4+35S:CsLOB1	482.428	26.516	3
PCsOB1:GUS+EV	0.68495	0.01395	3
Uninoculated	0.74639	0.03431	3
CsLOB1	Mean	SD	N
PCsLOB1:GUS	1	0.08906	3
PCsLOB1:GUS+35S:PthA4	449.133	49.8692	3
PCsLOB1:GUS+35S:PthA4+35S:CsLOB1	475.896	61.6527	3
PCsOB1:GUS+EV	1.17048	0.44847	3
Uninoculated	0.81331	0.02313	3
Figure 5C raw data
RLU	1	2	3
0	24609.5	19722.3	22165.9
0.05	18337.3	18276	19790.2
0.1	19739.8	18008.7	18874.2
0.2	12117.3	10703.2	15303.9
0.4	12058.3	14737.1	13397.7
0.6	7236.33	10941.1	7674.08
Figure 5D raw data
PthA4	Mean	SD	N
0 d	1	0.17826	3
5 d	64.844	18.1189	3
10 d	134.583	38.8204	3
CsLOB1	Mean	SD	N
0 d	1	0.06035	3
5 d	51.4007	1.84431	3
10 d	78.9976	2.62946	3
Cs9g12620	Mean	SD	N
0 d	1	0.1016	3
5 d	186.808	3.02322	3
10 d	148.465	2.20019	3
Figure 5E raw data
PthA4	Mean	SD	N
0 d	1	0.495434	3
049-5 d	23.8878	0.25348	3
049-10 d	35.8547	0.10935	3
049E-5 d	0.00343166	0.0748067	3
049E-10 d	0.0016016	0.16527	3
049E/pthA4-5 d	10.9859	0.164091	3
049E/pthA4-10 d	35.419	0.0368272	3
CsLOB1	Mean	SD	N
0 d	1	0.166757	3
049-5 d	147.142	0.0411069	3
049-10 d	172.639	0.00767508	3
049E-5 d	3.067	0.183901	3
049E-10 d	8.56689	0.202364	3
049E/pthA4-5 d	134.023	0.14437	3
049E/pthA4-10 d	203.649	0.169413	3
Cs9g12620	Mean	SD	N
0 d	1	0.171996	3
049-5 d	153.702	0.0921644	3
049-10 d	104.945	0.122106	3
049E-5 d	10.1882	0.0322536	3
049E-10 d	14.0142	0.0998806	3
049E/pthA4-5 d	106.066	0.0722824	3
049E/pthA4-10 d	44.2873	0.0719416	3
Figure 5F raw data
Bacterial growth Lg (CFU/cm2)	5d	10d
1	7.01495	7.48079
2	6.9424	7.37813
3	6.9424	7.24343
4	6.9424	7.43249
5	7.10513	7.44508
6	7.01495	7.37813
Figure 5G raw data
Orange1.1t02719	Mean	SD	N
0d	1	0.087167	4
5d	1.4061	0.042247	4
10d	0.717697	0.080845	4
Cs9g15150	Mean	SD	N
0d	1	0.123272	4
5d	13.3946	0.406212	4
10d	5.92106	0.406212	4
