# Supplementary material for: Xanthomonas citri subsp. citri type III effector PthA4 directs the dynamical expression of a putative citrus carbohydrate-binding protein gene for canker formation
Source: eLife. 2024 Aug 13;13:RP91684. doi: 10.7554/eLife.91684 (PMC11321762; doi:10.7554/eLife.91684)
Supplement: Figure 7—source data 1. [file elife-91684-fig7-data1.xlsx]

## Sheet: Sheet1
Figure 7C raw data
P23	Mean	SD	N
WT	1	0.127639	3
CTV	88.4303	1.8768	3
RNAi	118.516	0.165023	3
Cs9g12620	Mean	SD	N
WT	1	0.042169	3
CTV	1.00254	0.129819	3
RNAi	0.325389	0.107459	3
Figure 7E raw data
Bacterial growth Lg (CFU/cm2)	CTV			RNAi
0 d	10000	12890	11000	10000	11000	10650
2 d	670000	690000	970000	75000	81000	100000
4 d	7100000	7000000	6870000	640000	970000	670000
6 d	8900000	8800000	9100000	1100000	1200000	1400000
Figure 7F raw data
	CTV			RNAi
	Mean	SD	N	Mean	SD	N
Cs9g12620	1	0.062136	3	0.617739	0.044139	3
PthA4	1	0.018449	3	0.842409	0.034425	3
CsLOB1	1	0.073203	3	0.845061	0.062035	3
Figure 7H raw data
Bacterial growth Lg (CFU/cm2)	CTV			RNAi
49	7.36341	7.44508	7.04714	6.28122	5.98019	6.04714
049E	5.90101	6.20204	5.90101	5.90101	6.15628	5.8041
049E/pthA4	6.90101	6.8041	6.74611	6.48079	5.98019	6.04714
